# Supplementary material for: A comparison of optical, electrochemical and self-assembling properties of two structural isomers based on 1,6- and 1,8-pyrenedione chromophores
Source: Royal Society of Chemistry journal article supplement (doi:10.1039/c7nj04932c), 2018-01-01
Supplement: c7nj04932c1.pdf [file c7nj04932c1.pdf]

## Electronic Supporting Information for:

### A comparison of optical, electrochemical and self-assembling properties of two structural isomers based on 1,6- and 1,8-pyrenedione chromophores

Samantha N. Keller, and Todd. C. Sutherland\*

#### Table of contents:

|                                                                                                                                                                                                                                                                                                                                                                             |    |
|-----------------------------------------------------------------------------------------------------------------------------------------------------------------------------------------------------------------------------------------------------------------------------------------------------------------------------------------------------------------------------|----|
| Figure 1. $^1\text{H}$ and $^{13}\text{C}$ NMR of 3 .....                                                                                                                                                                                                                                                                                                                   | 2  |
| Figure 2. $^1\text{H}$ and $^{13}\text{C}$ NMR of 4 .....                                                                                                                                                                                                                                                                                                                   | 3  |
| Figure 3. $^1\text{H}$ and $^{13}\text{C}$ NMR of 5 .....                                                                                                                                                                                                                                                                                                                   | 4  |
| Figure 4 $^1\text{H}$ and $^{13}\text{C}$ NMR of 6 .....                                                                                                                                                                                                                                                                                                                    | 5  |
| Figure 5 $^1\text{H}$ and $^{13}\text{C}$ NMR of 7 .....                                                                                                                                                                                                                                                                                                                    | 6  |
| Figure 6. $^1\text{H}$ and $^{13}\text{C}$ NMR of 8 .....                                                                                                                                                                                                                                                                                                                   | 7  |
| Figure 7. $^1\text{H}$ and $^{13}\text{C}$ NMR of 16ketPyr .....                                                                                                                                                                                                                                                                                                            | 8  |
| Figure 8. $^1\text{H}$ and $^{13}\text{C}$ NMR of 18ketPyr .....                                                                                                                                                                                                                                                                                                            | 9  |
| Figure 9. DPVs of <b>16ketPyr</b> and <b>18ketPyr</b> in $\text{CH}_2\text{Cl}_2$ solution with 0.05 M $\text{NBu}_4\text{PF}_6$ electrolyte. Measurements were taken with a Pt button working electrode, Ag wire reference electrode, and Pt wire counter electrode. ....                                                                                                  | 10 |
| Figure 10. CVs of <b>16ketPyr</b> and <b>18ketPyr</b> in $\text{CH}_2\text{Cl}_2$ solution with 0.05 M $\text{NBu}_4\text{PF}_6$ electrolyte. Measurements were taken with a scan rate of $20 \text{ mV s}^{-1}$ using a glassy carbon working electrode, Ag wire reference electrode, and Pt wire counter electrode. ....                                                  | 10 |
| Figure 11. Spectroelectrochemical studies of (a) <b>16ketPyr</b> and (b) <b>18ketPyr</b> in $\text{CHCl}_3$ as a function of applied potential. Initial spectra (0V applied) are dotted lines, and final spectra are solid black lines. Application of -700 mV vs Ag wire quasi reference. ....                                                                             | 11 |
| Figure 12. Molecular orbital energy levels and surfaces calculated for compounds <b>16ketPyr</b> (left) and <b>18ketPyr</b> (right). Surfaces calculated at the B3LYP/6-31+g(d) level of theory and basis set, and energy levels obtained by single point TD-DFT calculations at the same level of theory and basis set, including the PCM solvent model in chloroform..... | 11 |
| Table 1. Allowed transitions calculated with TD-DFT for compounds <b>16ketPyr</b> and <b>18ketPyr</b> .....                                                                                                                                                                                                                                                                 | 12 |

Figure 1.  $^1\text{H}$  and  $^{13}\text{C}$  NMR of 3

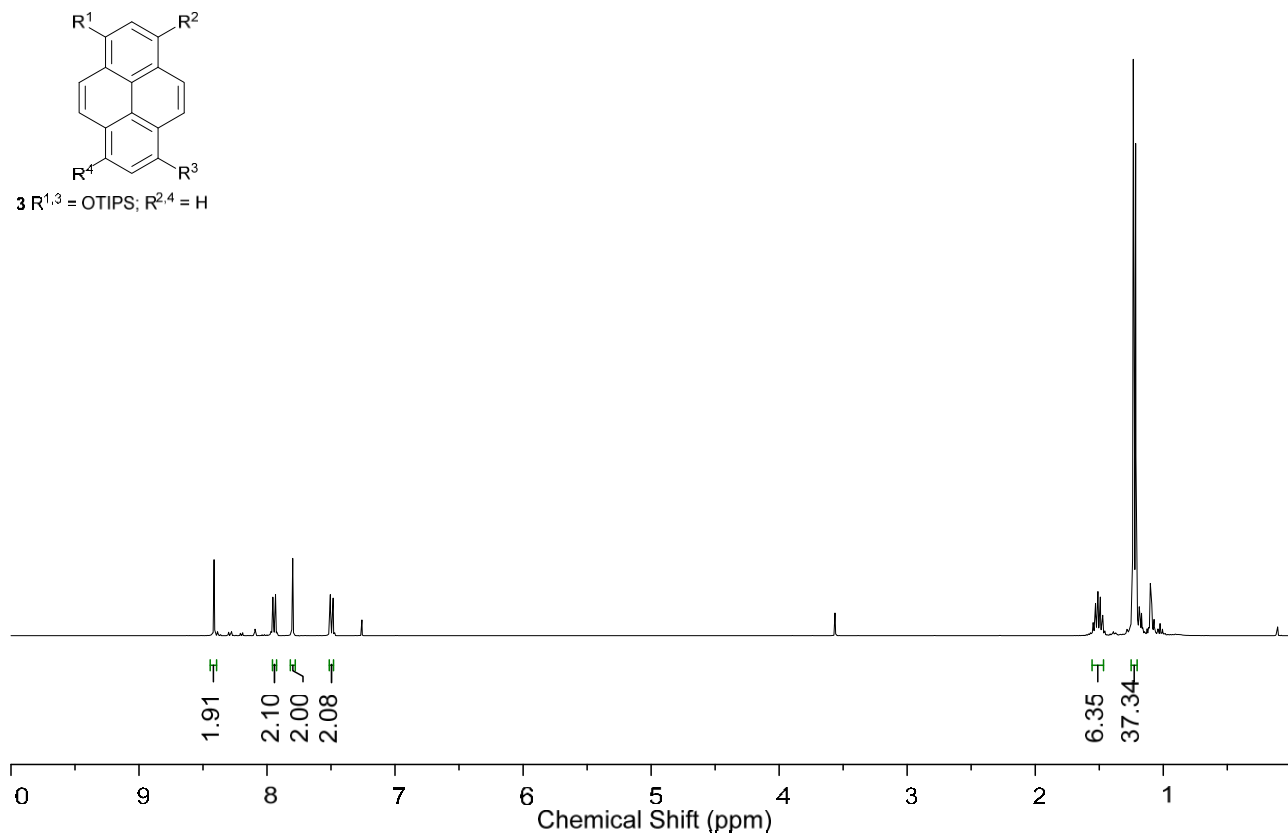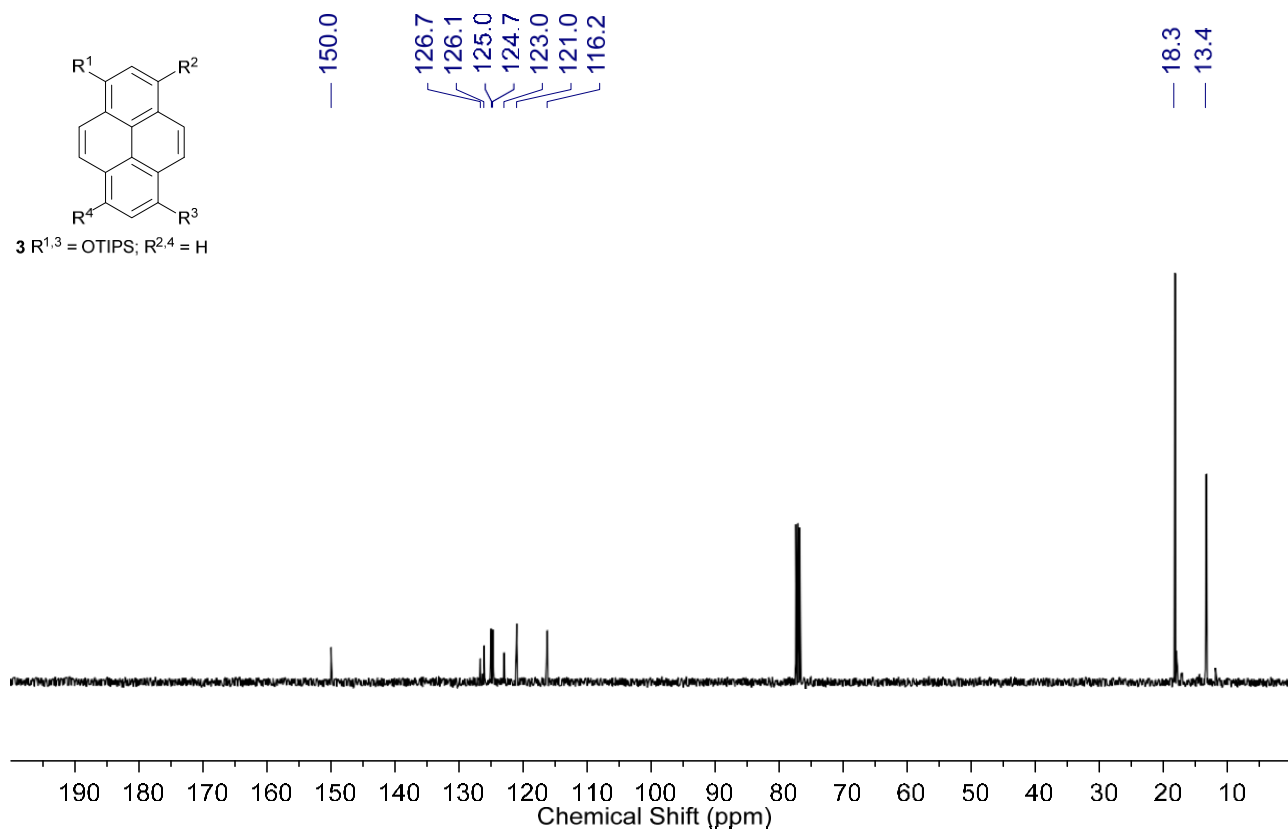

Figure 2.  $^1\text{H}$  and  $^{13}\text{C}$  NMR of 4

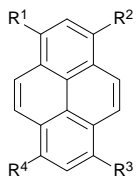

4  $\text{R}^{1,4} = \text{OTIPS}$ ;  $\text{R}^{2,3} = \text{H}$

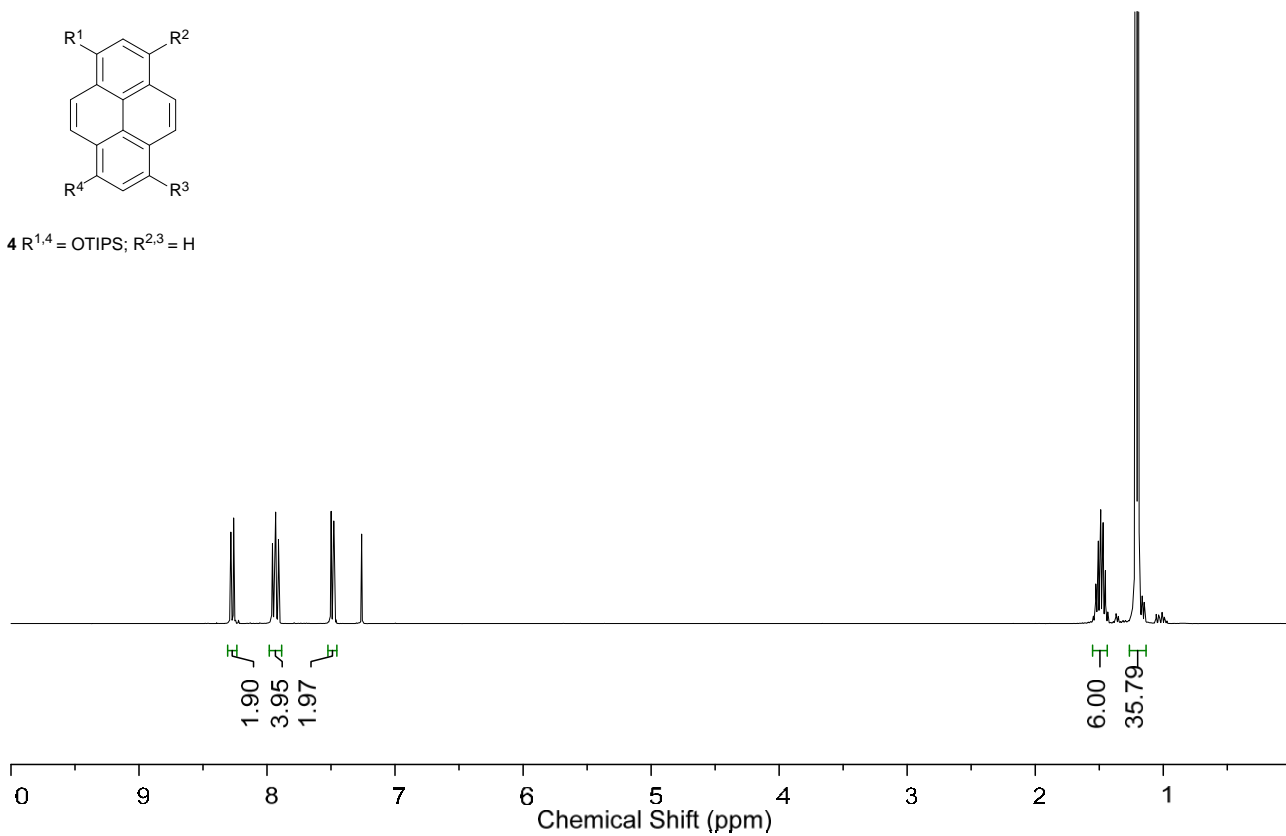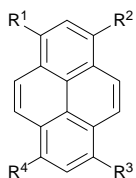

4  $\text{R}^{1,4} = \text{OTIPS}$ ;  $\text{R}^{2,3} = \text{H}$

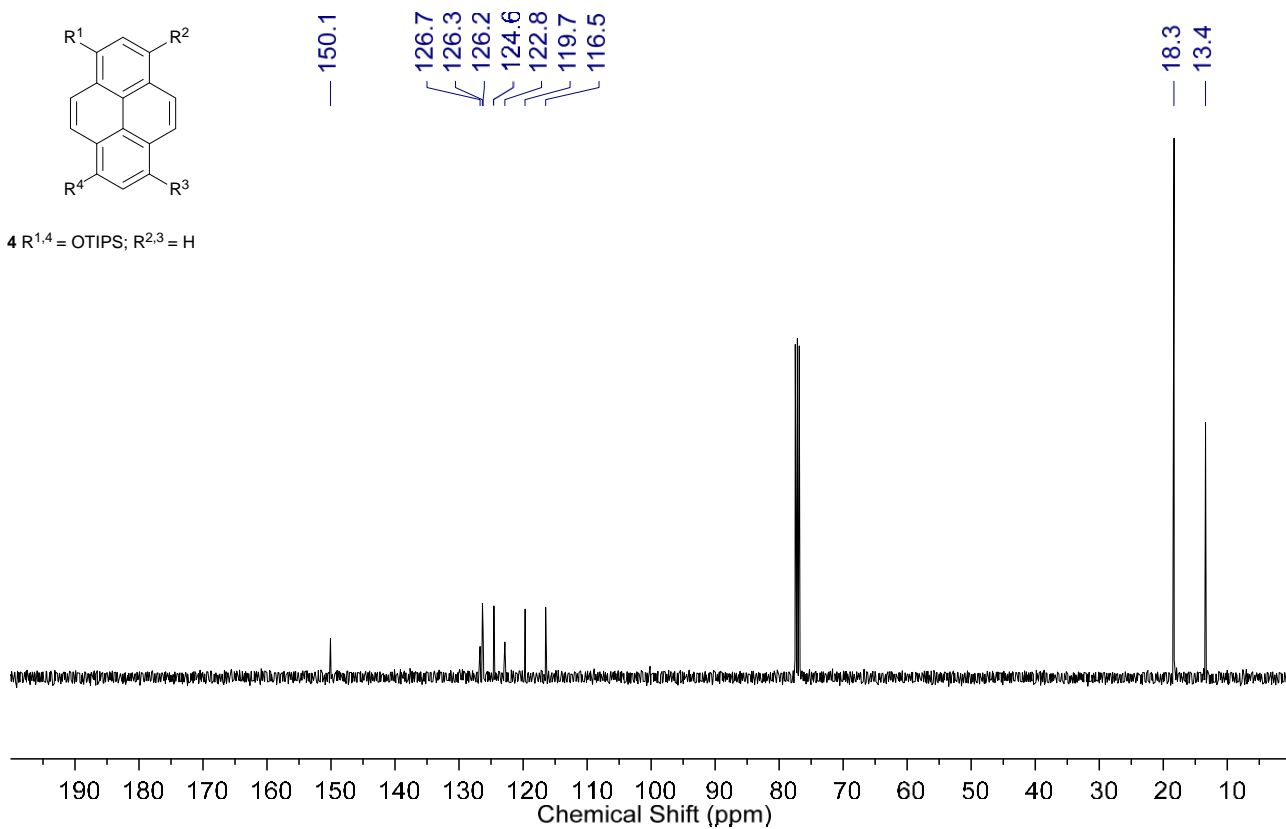

Figure 3.  $^1\text{H}$  and  $^{13}\text{C}$  NMR of 5

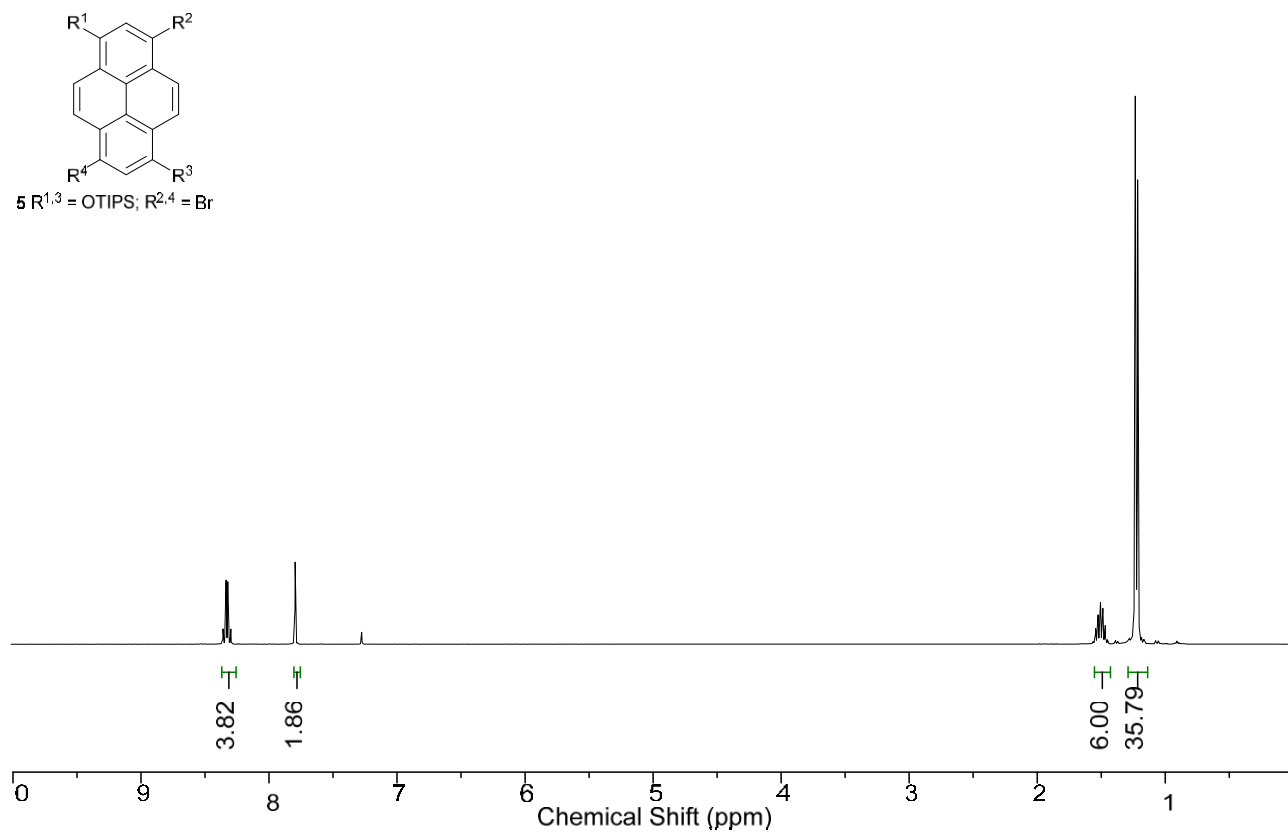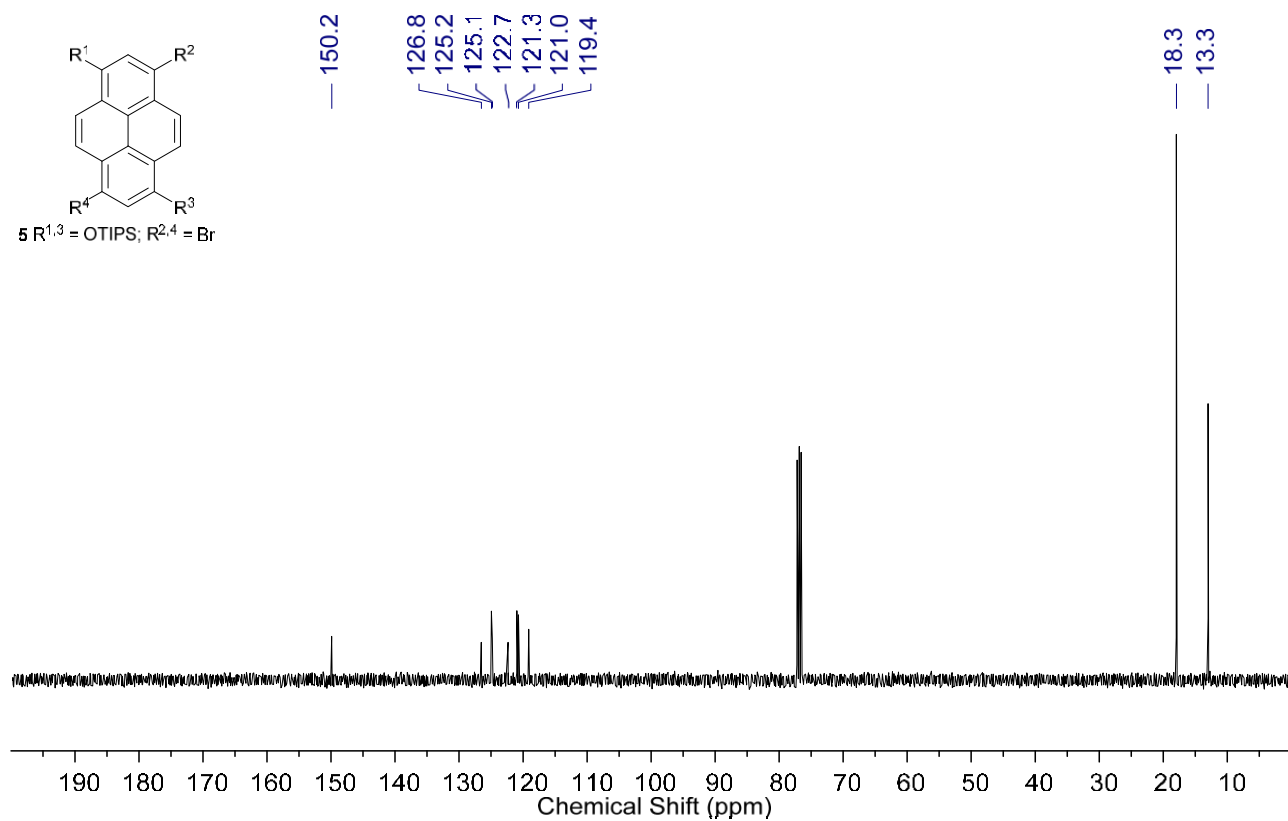

Figure 4.  $^1\text{H}$  and  $^{13}\text{C}$  NMR of **6**

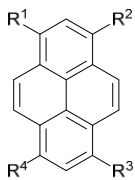

**6**  $\text{R}^{1,4} = \text{OTIPS}$ ;  $\text{R}^{2,3} = \text{Br}$

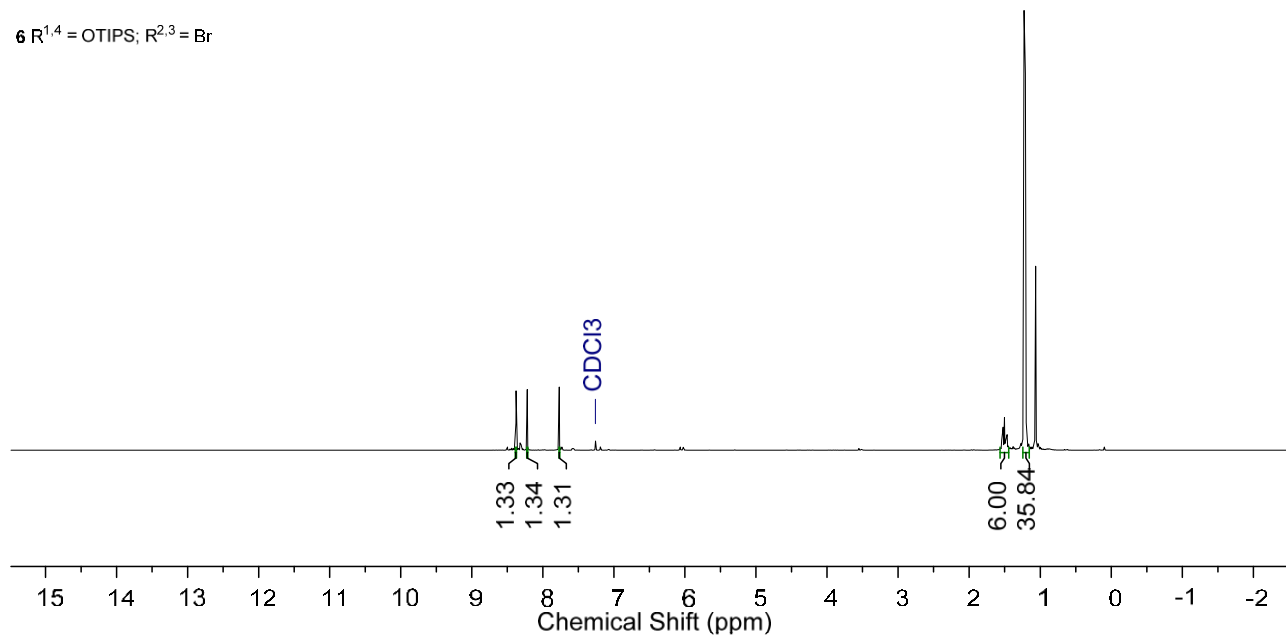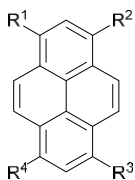

**6**  $\text{R}^{1,4} = \text{OTIPS}$ ;  $\text{R}^{2,3} = \text{Br}$

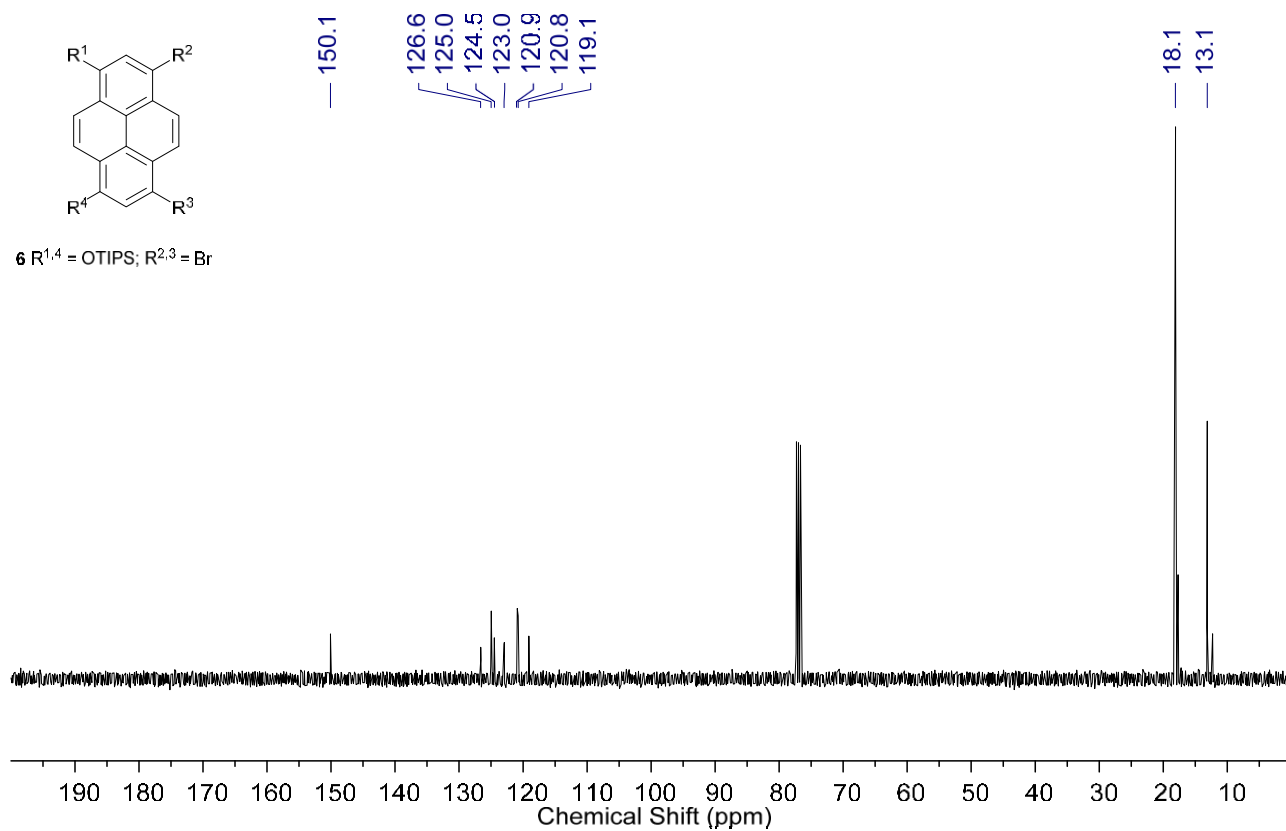

Figure 5  $^1\text{H}$  and  $^{13}\text{C}$  NMR of 7

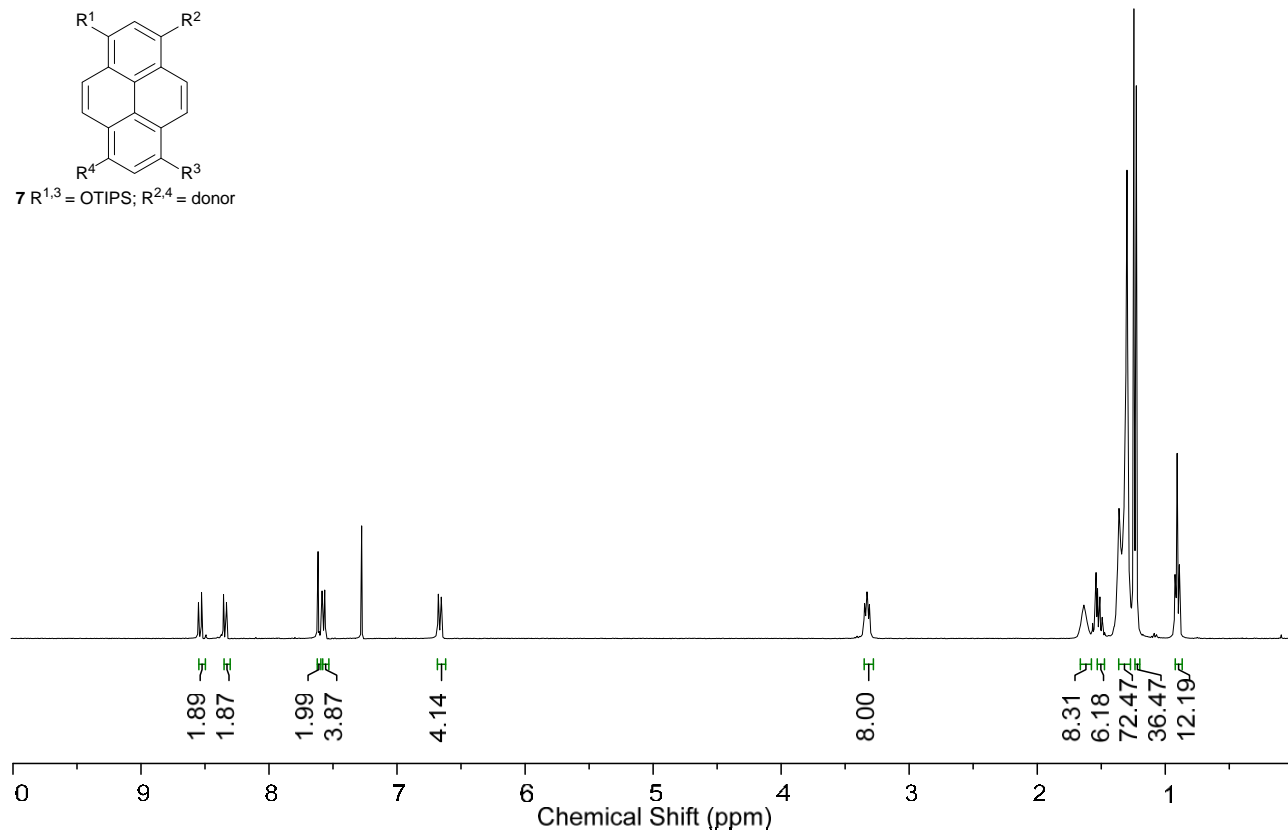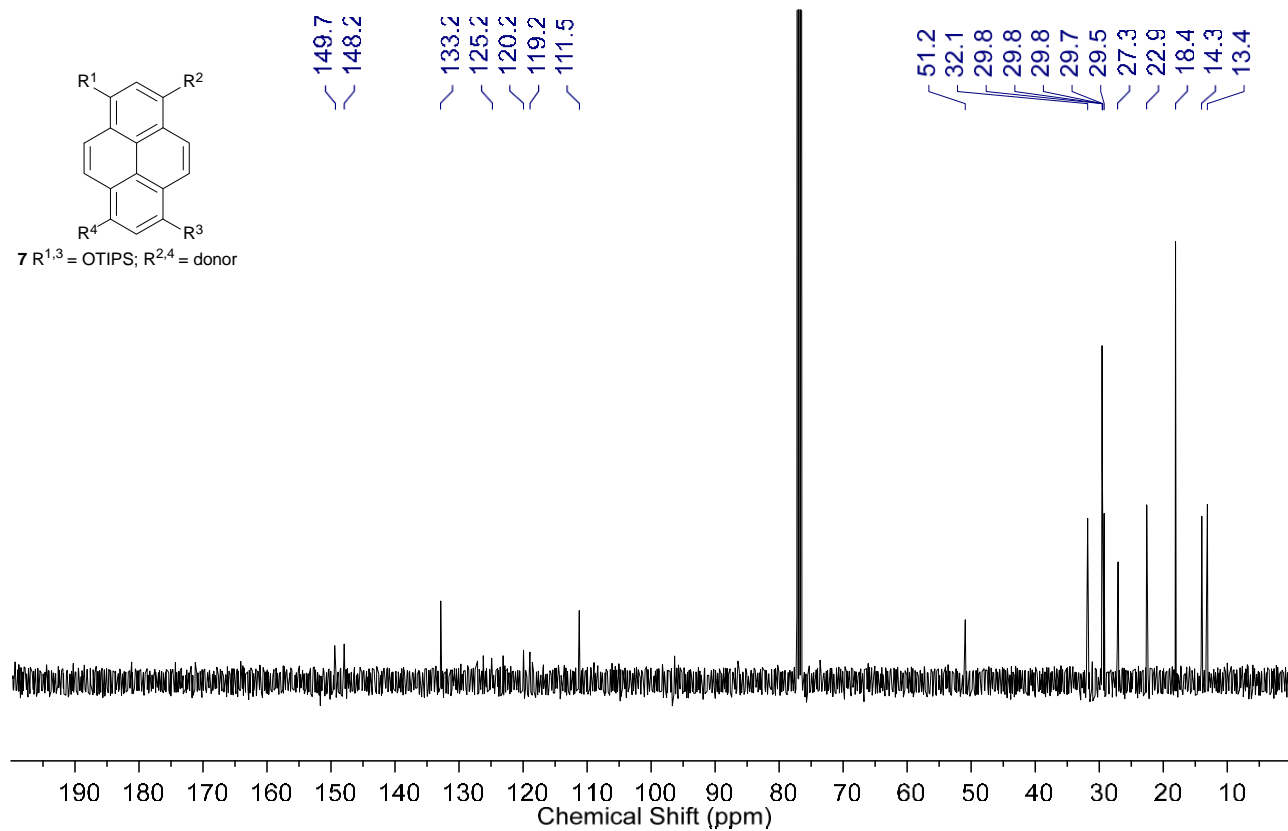

Figure 6.  $^1\text{H}$  and  $^{13}\text{C}$  NMR of **8**

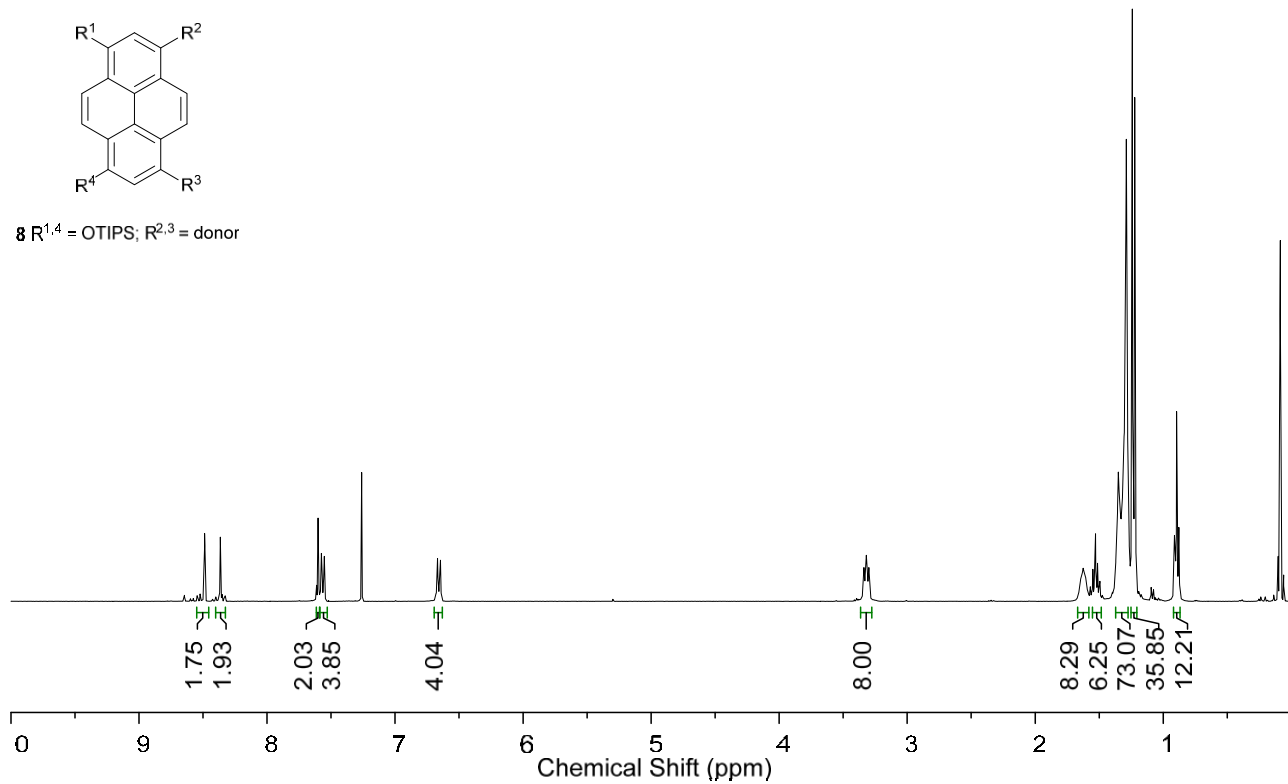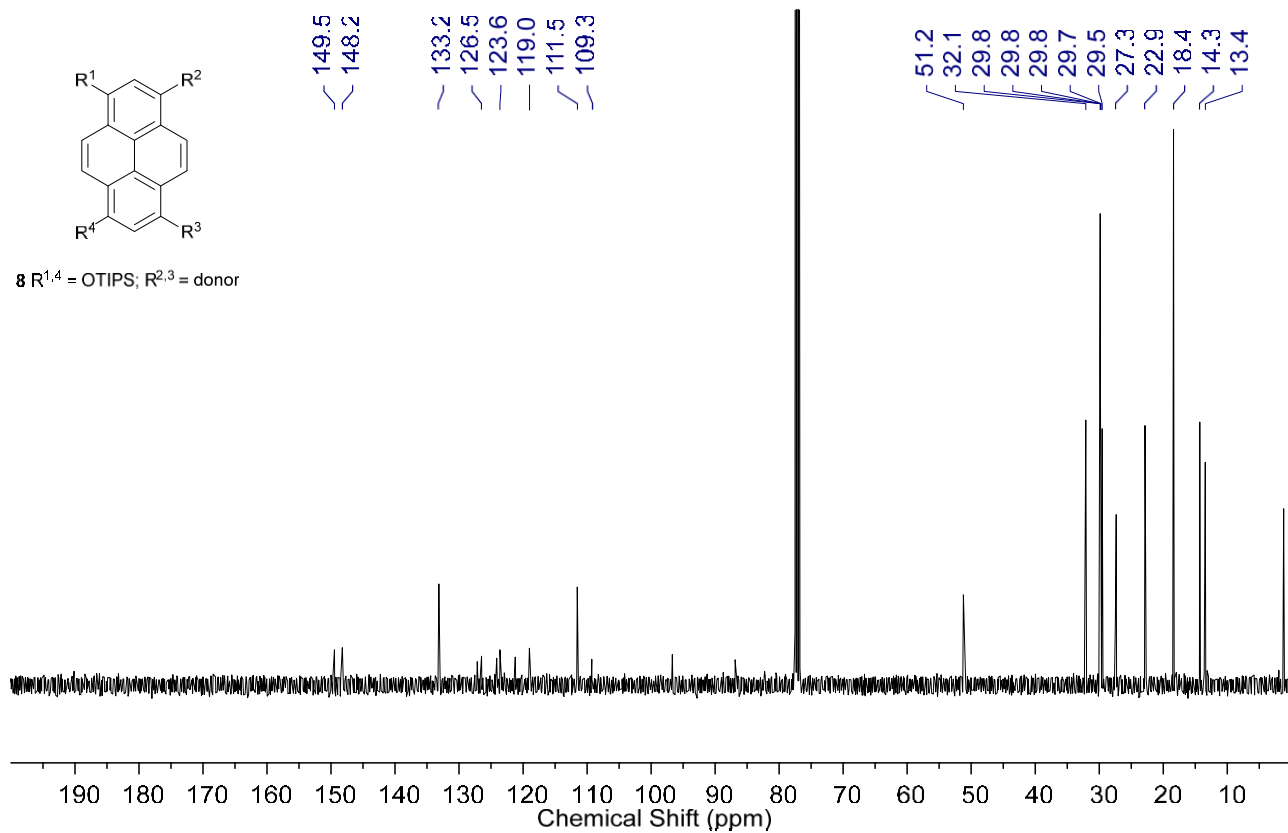

Figure 7. <sup>1</sup>H and <sup>13</sup>C NMR of 16ketPyr

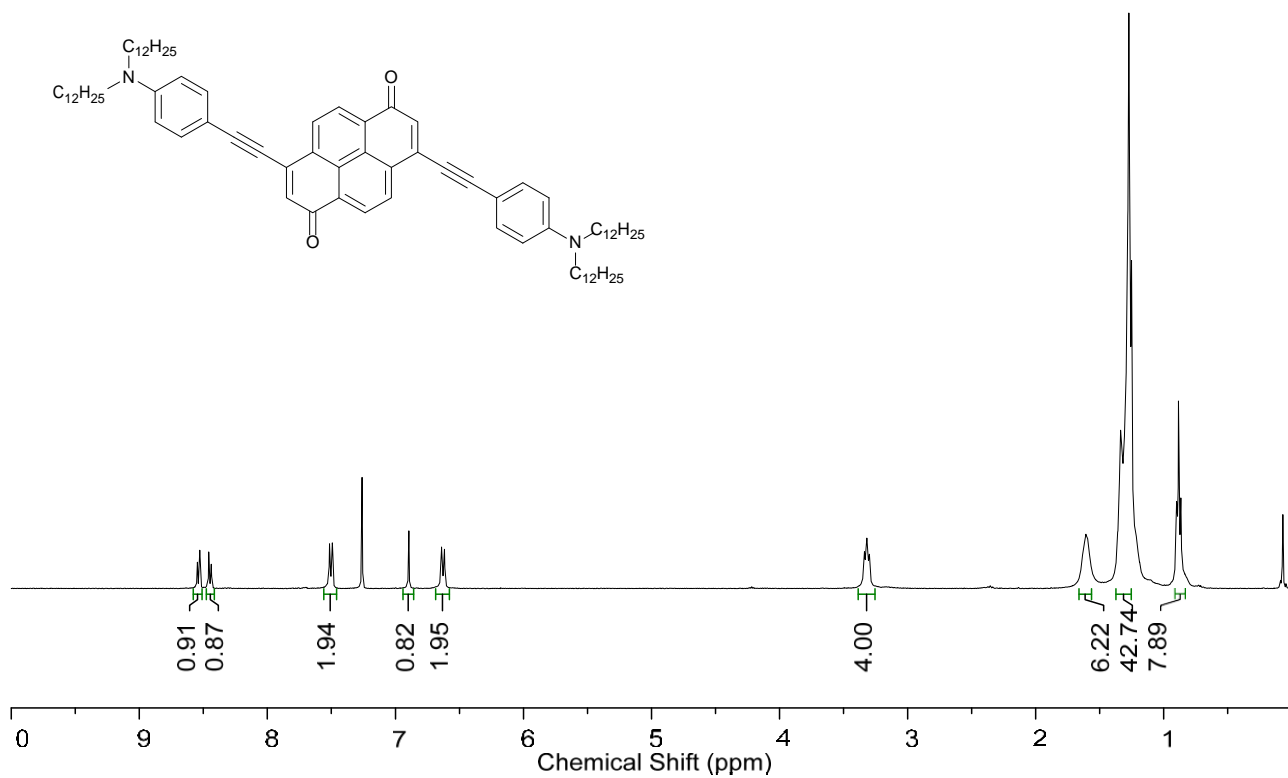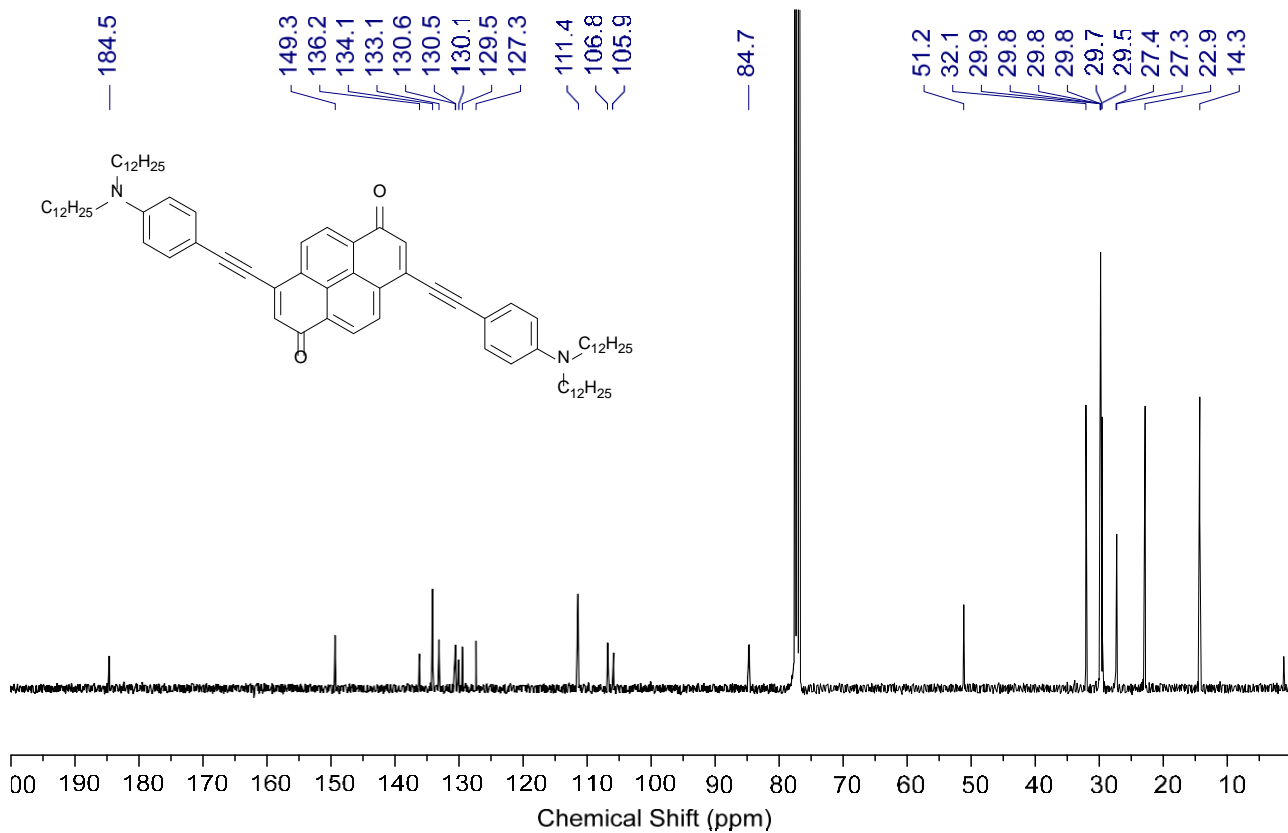



Figure 8.  $^1\text{H}$  and  $^{13}\text{C}$  NMR of 18ketPyr

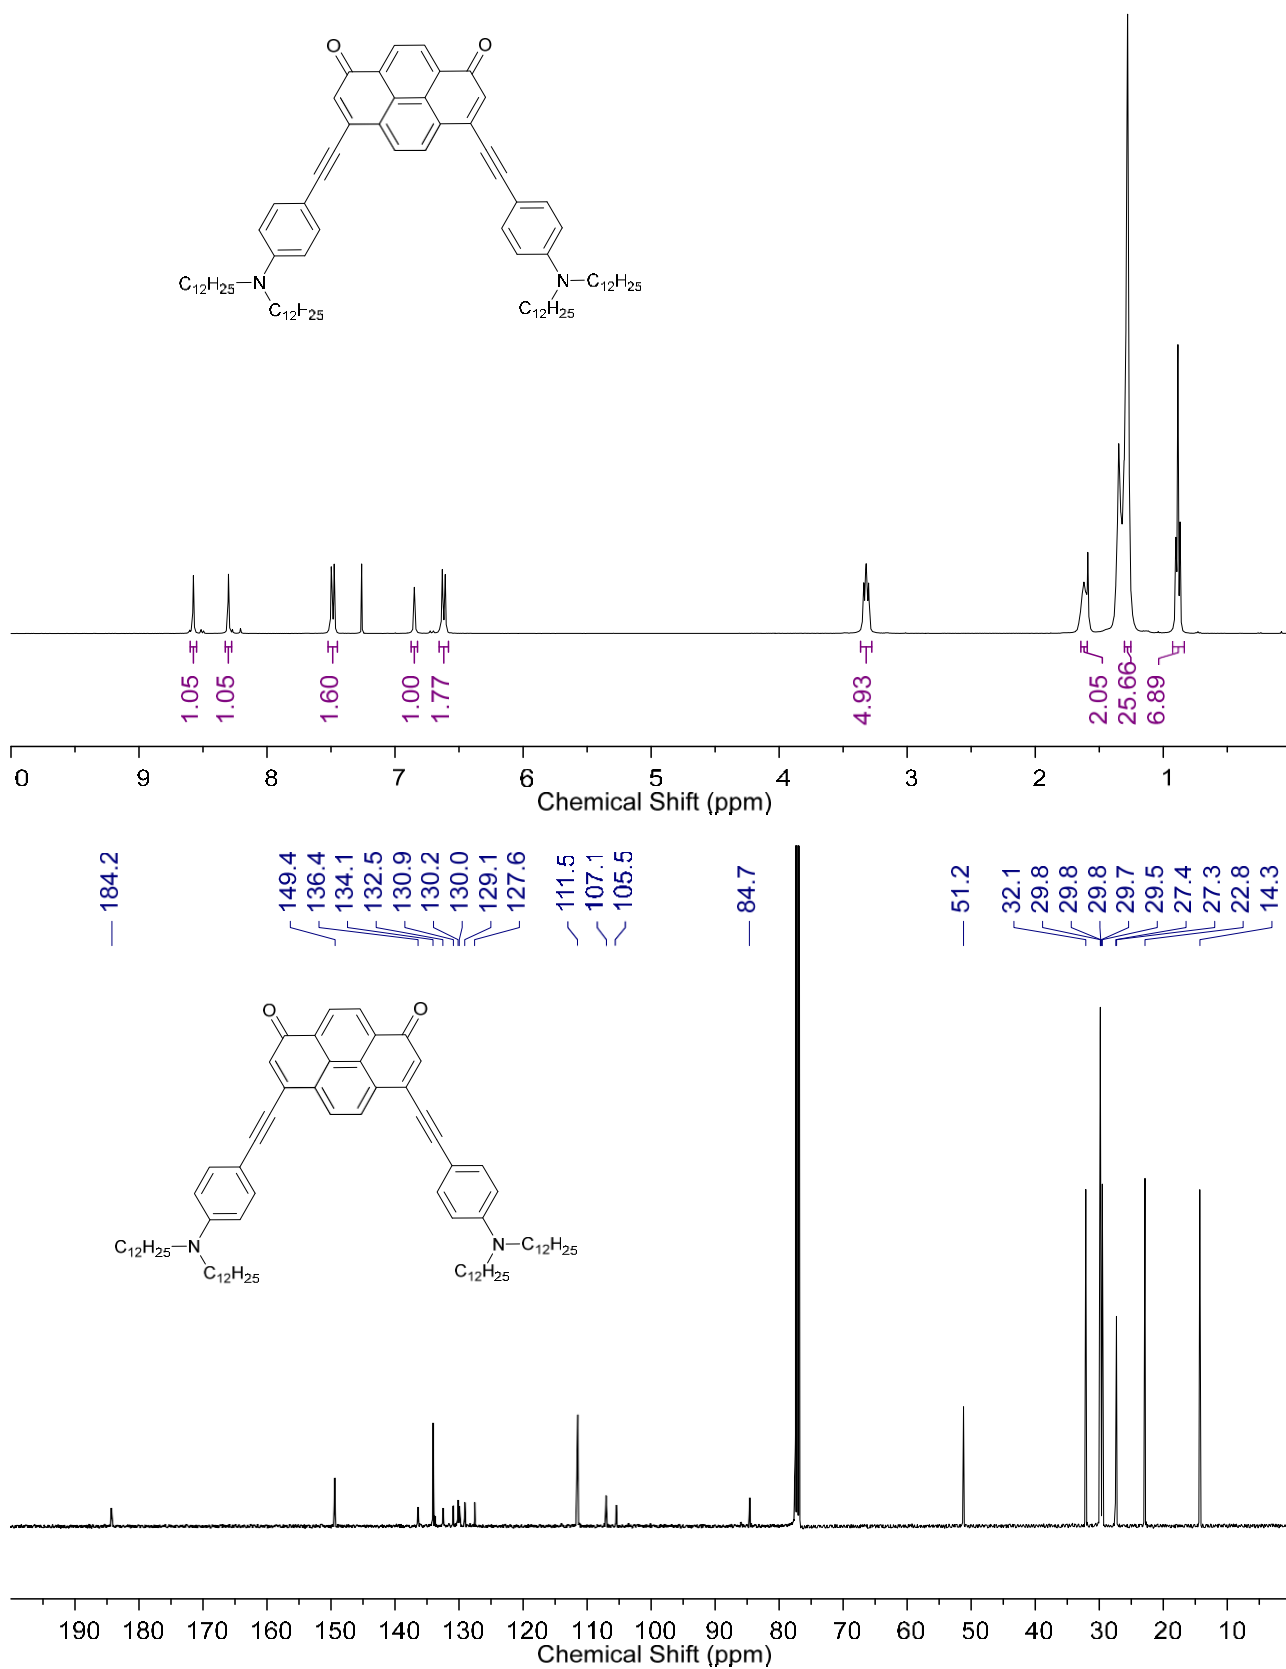

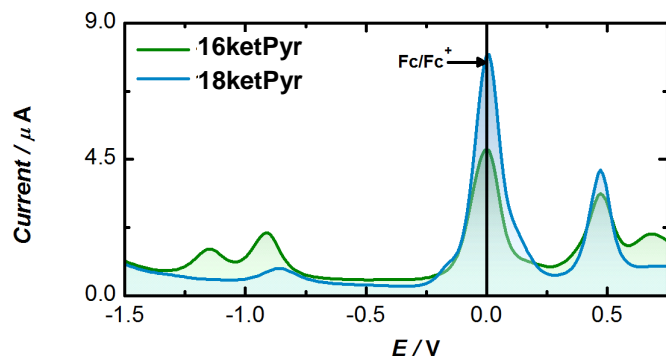

Figure 9. DPVs of **16ketPyr** and **18ketPyr** in  $\text{CH}_2\text{Cl}_2$  solution with 0.05 M  $\text{NBu}_4\text{PF}_6$  electrolyte. Measurements were taken with a Pt button working electrode, Ag wire reference electrode, and Pt wire counter electrode.

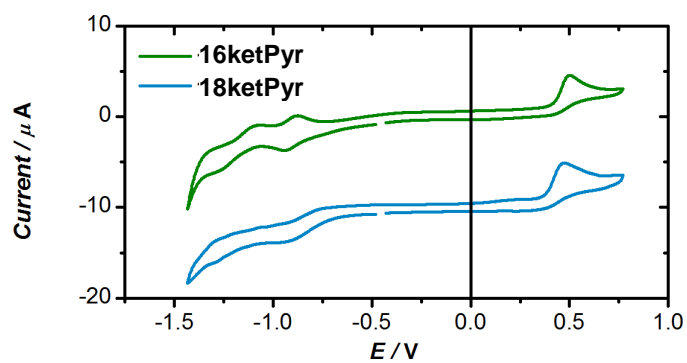

Figure 10. CVs of **16ketPyr** and **18ketPyr** in  $\text{CH}_2\text{Cl}_2$  solution with 0.05 M  $\text{NBu}_4\text{PF}_6$  electrolyte. Measurements were taken with a scan rate of  $20\text{ mV s}^{-1}$  using a glassy carbon working electrode, Ag wire reference electrode, and Pt wire counter electrode.

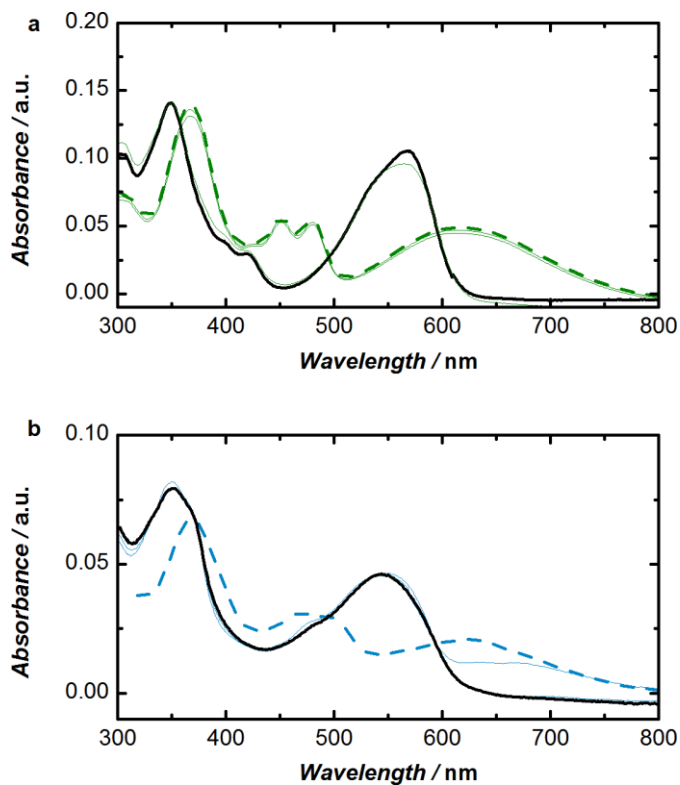

Figure 11. Spectroelectrochemical studies of (a) **16ketPyr** and (b) **18ketPyr** in  $\text{CHCl}_3$  as a function of applied potential. Initial spectra (0V applied) are dotted lines, and final spectra are solid black lines. Application of -700mV vs Ag wire quasi reference.

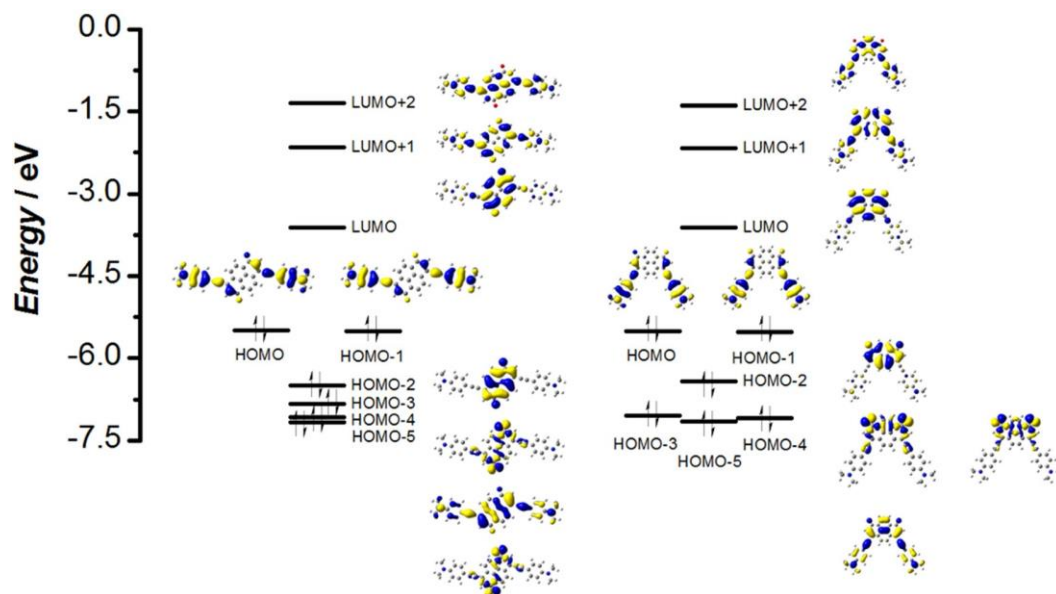

Figure 12. Molecular orbital energy levels and surfaces calculated for compounds **16ketPyr** (left) and **18ketPyr** (right). Surfaces calculated at the B3LYP/6-31+g(d) level of theory and basis set, and energy levels obtained by single point TD-DFT calculations at the same level of theory and basis set, including the PCM solvent model in chloroform.

Table 1. Allowed transitions calculated with TD-DFT for compounds **16ketPyr** and **18ketPyr**.

| Compound        | Major Transition                            | Wavelength (nm) | Energy (eV) | Oscillator Strength |
|-----------------|---------------------------------------------|-----------------|-------------|---------------------|
| <b>16ketPyr</b> | HOMO - LUMO (100%)                          | 788             | 1.57        | 0.6615              |
|                 | HOMO-2 - LUMO (91%)                         | 481             | 2.57        | 0.5941              |
|                 | HOMO-1 - LUMO+1 (7%)                        |                 |             |                     |
|                 | HOMO-5 - LUMO (37%)                         | 411             | 3.02        | 0.4796              |
|                 | HOMO-1 - LUMO+1 (51%)                       |                 |             |                     |
|                 | HOMO-9 - LUMO (8%)<br>HOMO-2 - LUMO (3%)    |                 |             |                     |
|                 | HOMO-5 - LUMO (54%)                         | 391             | 3.17        | 0.2891              |
|                 | HOMO-1 - LUMO+1 (39%)<br>HOMO-2 - LUMO (4%) |                 |             |                     |
| <b>18ketPyr</b> | HOMO - LUMO (100%)                          | 789             | 1.57        | 0.2106              |
|                 | HOMO-1 - LUMO (100%)                        | 748             | 1.66        | 0.3135              |
|                 | HOMO-2 - LUMO (93%)                         | 504             | 2.45        | 0.4615              |
|                 | HOMO-1 - LUMO+1 (2%)                        |                 |             |                     |
|                 | HOMO-4 - LUMO (56%)                         | 420             | 2.95        | 0.2860              |
|                 | HOMO-1 - LUMO+1 (42%)                       |                 |             |                     |
|                 | HOMO-9 - LUMO (8%)                          | 418             | 2.96        | 0.0527              |
|                 | HOMO-3 - LUMO (81%)                         |                 |             |                     |
|                 | HOMO - LUMO+1 (9%)                          |                 |             |                     |
|                 | HOMO-3 - LUMO (10%)                         | 406             | 3.05        | 0.7381              |
|                 | HOMO - LUMO+1 (89%)                         |                 |             |                     |
|                 | HOMO-4 - LUMO (39%)                         | 396             | 3.13        | 0.0022              |
|                 | HOMO-2 - LUMO (4%)                          |                 |             |                     |
|                 | HOMO-1 - LUMO+1 (55%)                       |                 |             |                     |

---
